# Supplementary material for: Characterization of Rift Valley Fever Virus MP-12 Strain Encoding NSs of Punta Toro Virus or Sandfly Fever Sicilian Virus
Source: PubMed Central journal article supplement (PMC3630143; doi:10.1371/journal.pntd.0002181), 2013-04-18

**A**

rMP12-PTNSs group  
Survived: Neut Ab (+)

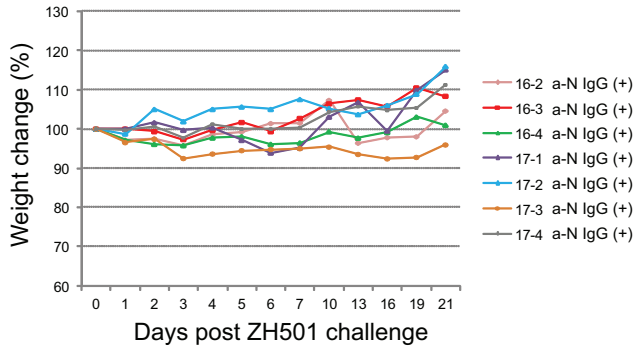**B**

rMP12-PTNSs group  
Dead: Neut Ab (-)

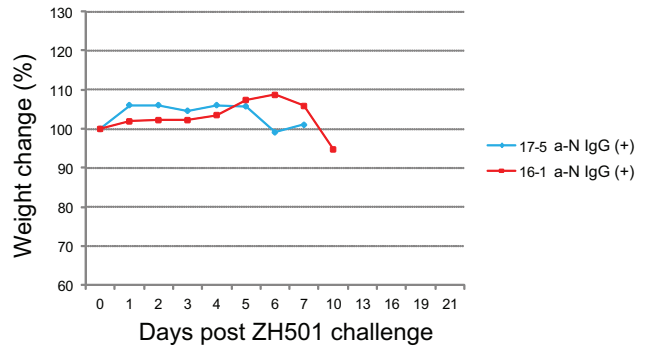**C**

rMP12-SFSNSs group  
Survived: Neut Ab (+)

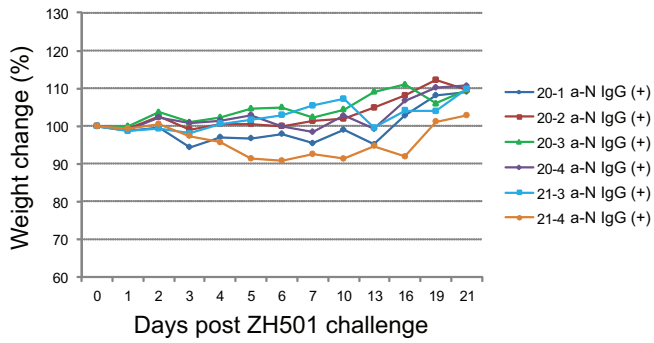**D**

rMP12-SFSNSs group  
Survived / Dead: Neut Ab (-)

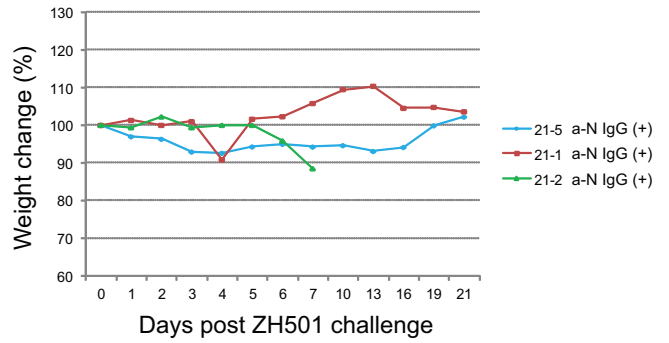

Supplement: pntd.0002181.s003.pdf [file pntd.0002181.s003.pdf]
