# Supplementary material for: Characterization of Rift Valley Fever Virus MP-12 Strain Encoding NSs of Punta Toro Virus or Sandfly Fever Sicilian Virus
Source: PubMed Central journal article supplement (PMC3630143; doi:10.1371/journal.pntd.0002181), 2013-04-18

**A**

anti-RVSV Ab

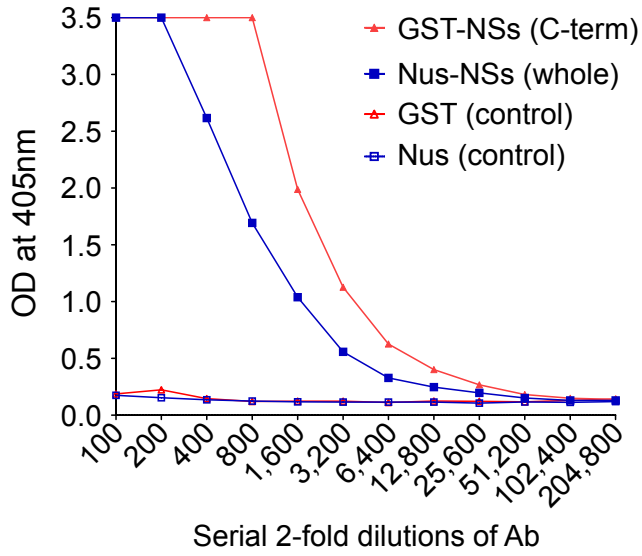**B**

anti-NSs Ab

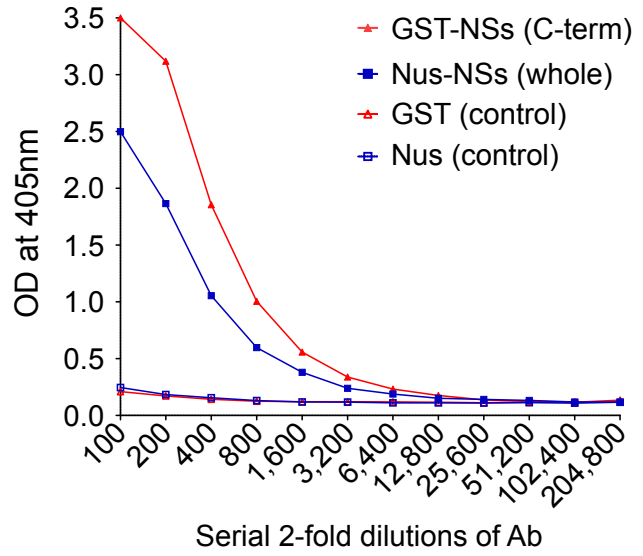

Supplement: pntd.0002181.s004.pdf [file pntd.0002181.s004.pdf]
